# Supplementary material
Source: PubMed Central journal article supplement (PMC7585930)
Supplement: JCB891359_Supplemental_Material3.pdf [file JCB891359_Supplemental_Material3.pdf]

Table 1: Defined order and number of full rounds for each induced frequency.

| Order | Frequency<br>[Hz] | # of Oscillations |
|-------|-------------------|-------------------|
| 1     | 0.025             | 4                 |
| 2     | 0.059             | 8                 |
| 3     | 0.017             | 4                 |
| 4     | 0.033             | 4                 |
| 5     | 0.009             | 4                 |

**Supplementary Figure 1.** Induced  $ICP_{ip}$  changes are shown over time for the seven NHP. For the first four animals a gravitational system was used to influence ICP, for the last three a syringe pump forced the fluid through the ventricular catheter to increase the ICP.

**Supplementary Figure 2.** The top two graphs illustrate the spectral power color-coded as a function of frequency (y-axis) and time (x-axis). The left plots show  $\Delta HbO$  while the right plots show  $ICP_{ip}$ . The drift in heart rate can be observed in the top graphs while the middle graphs show respiration rate and the lower graphs are zoomed in to frequencies below 0.1Hz. Here, the expected spectral power increases in certain time frames for pre-defined frequencies (according to induced ICP oscillations) are highlighted by white boxes. The oscillations induced in  $ICP_{ip}$  can also be found in  $\Delta HbO$ .
