# Supplementary material
Source: PubMed Central journal article supplement (PMC7585930)

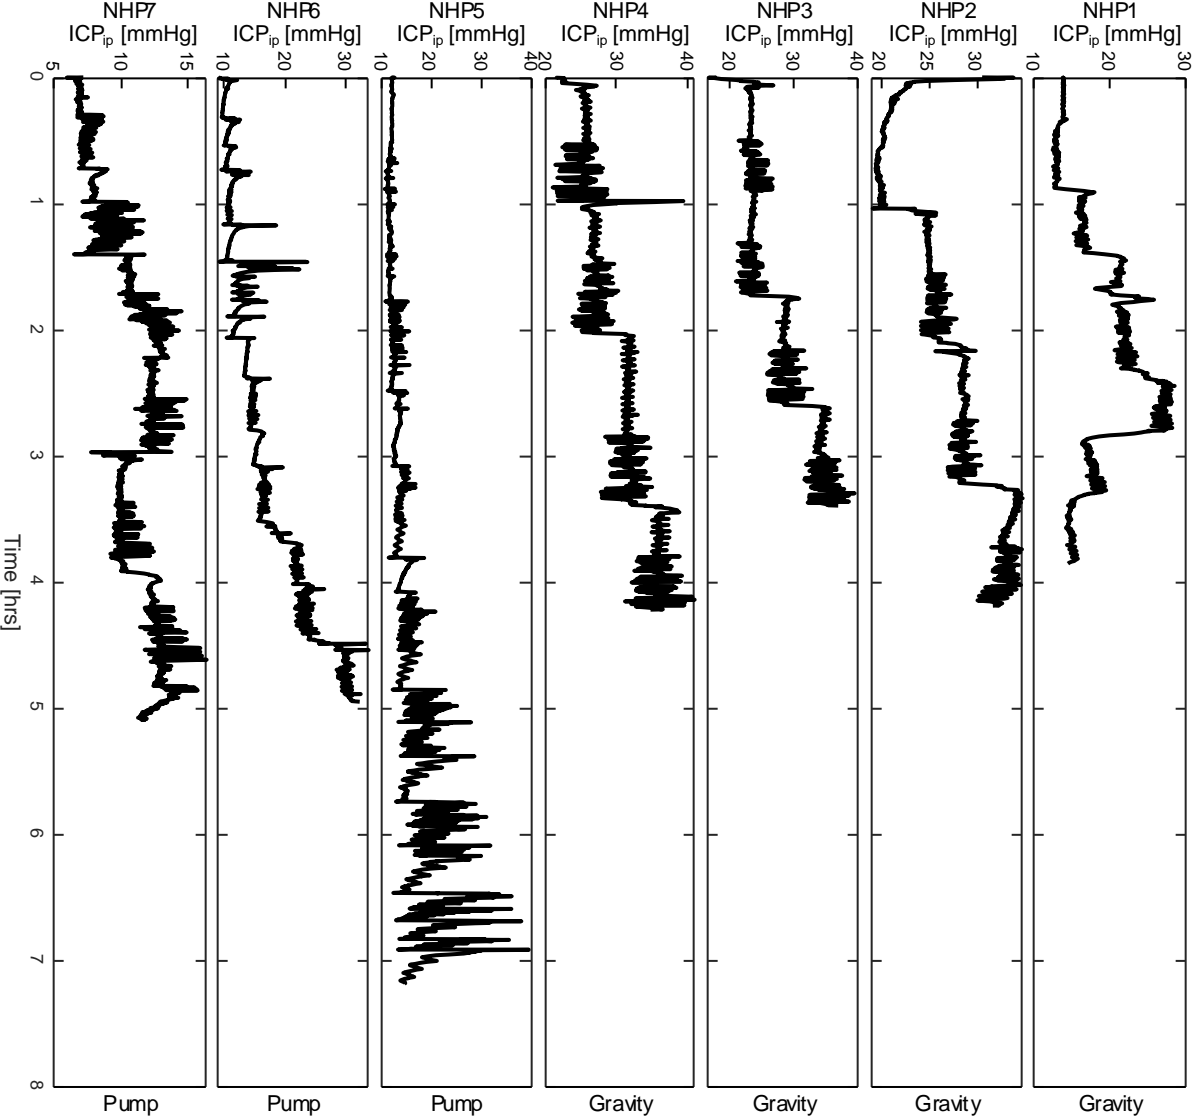

Supplement: JCB891359_Supplemental_Material1.pdf [file JCB891359_Supplemental_Material1.pdf]

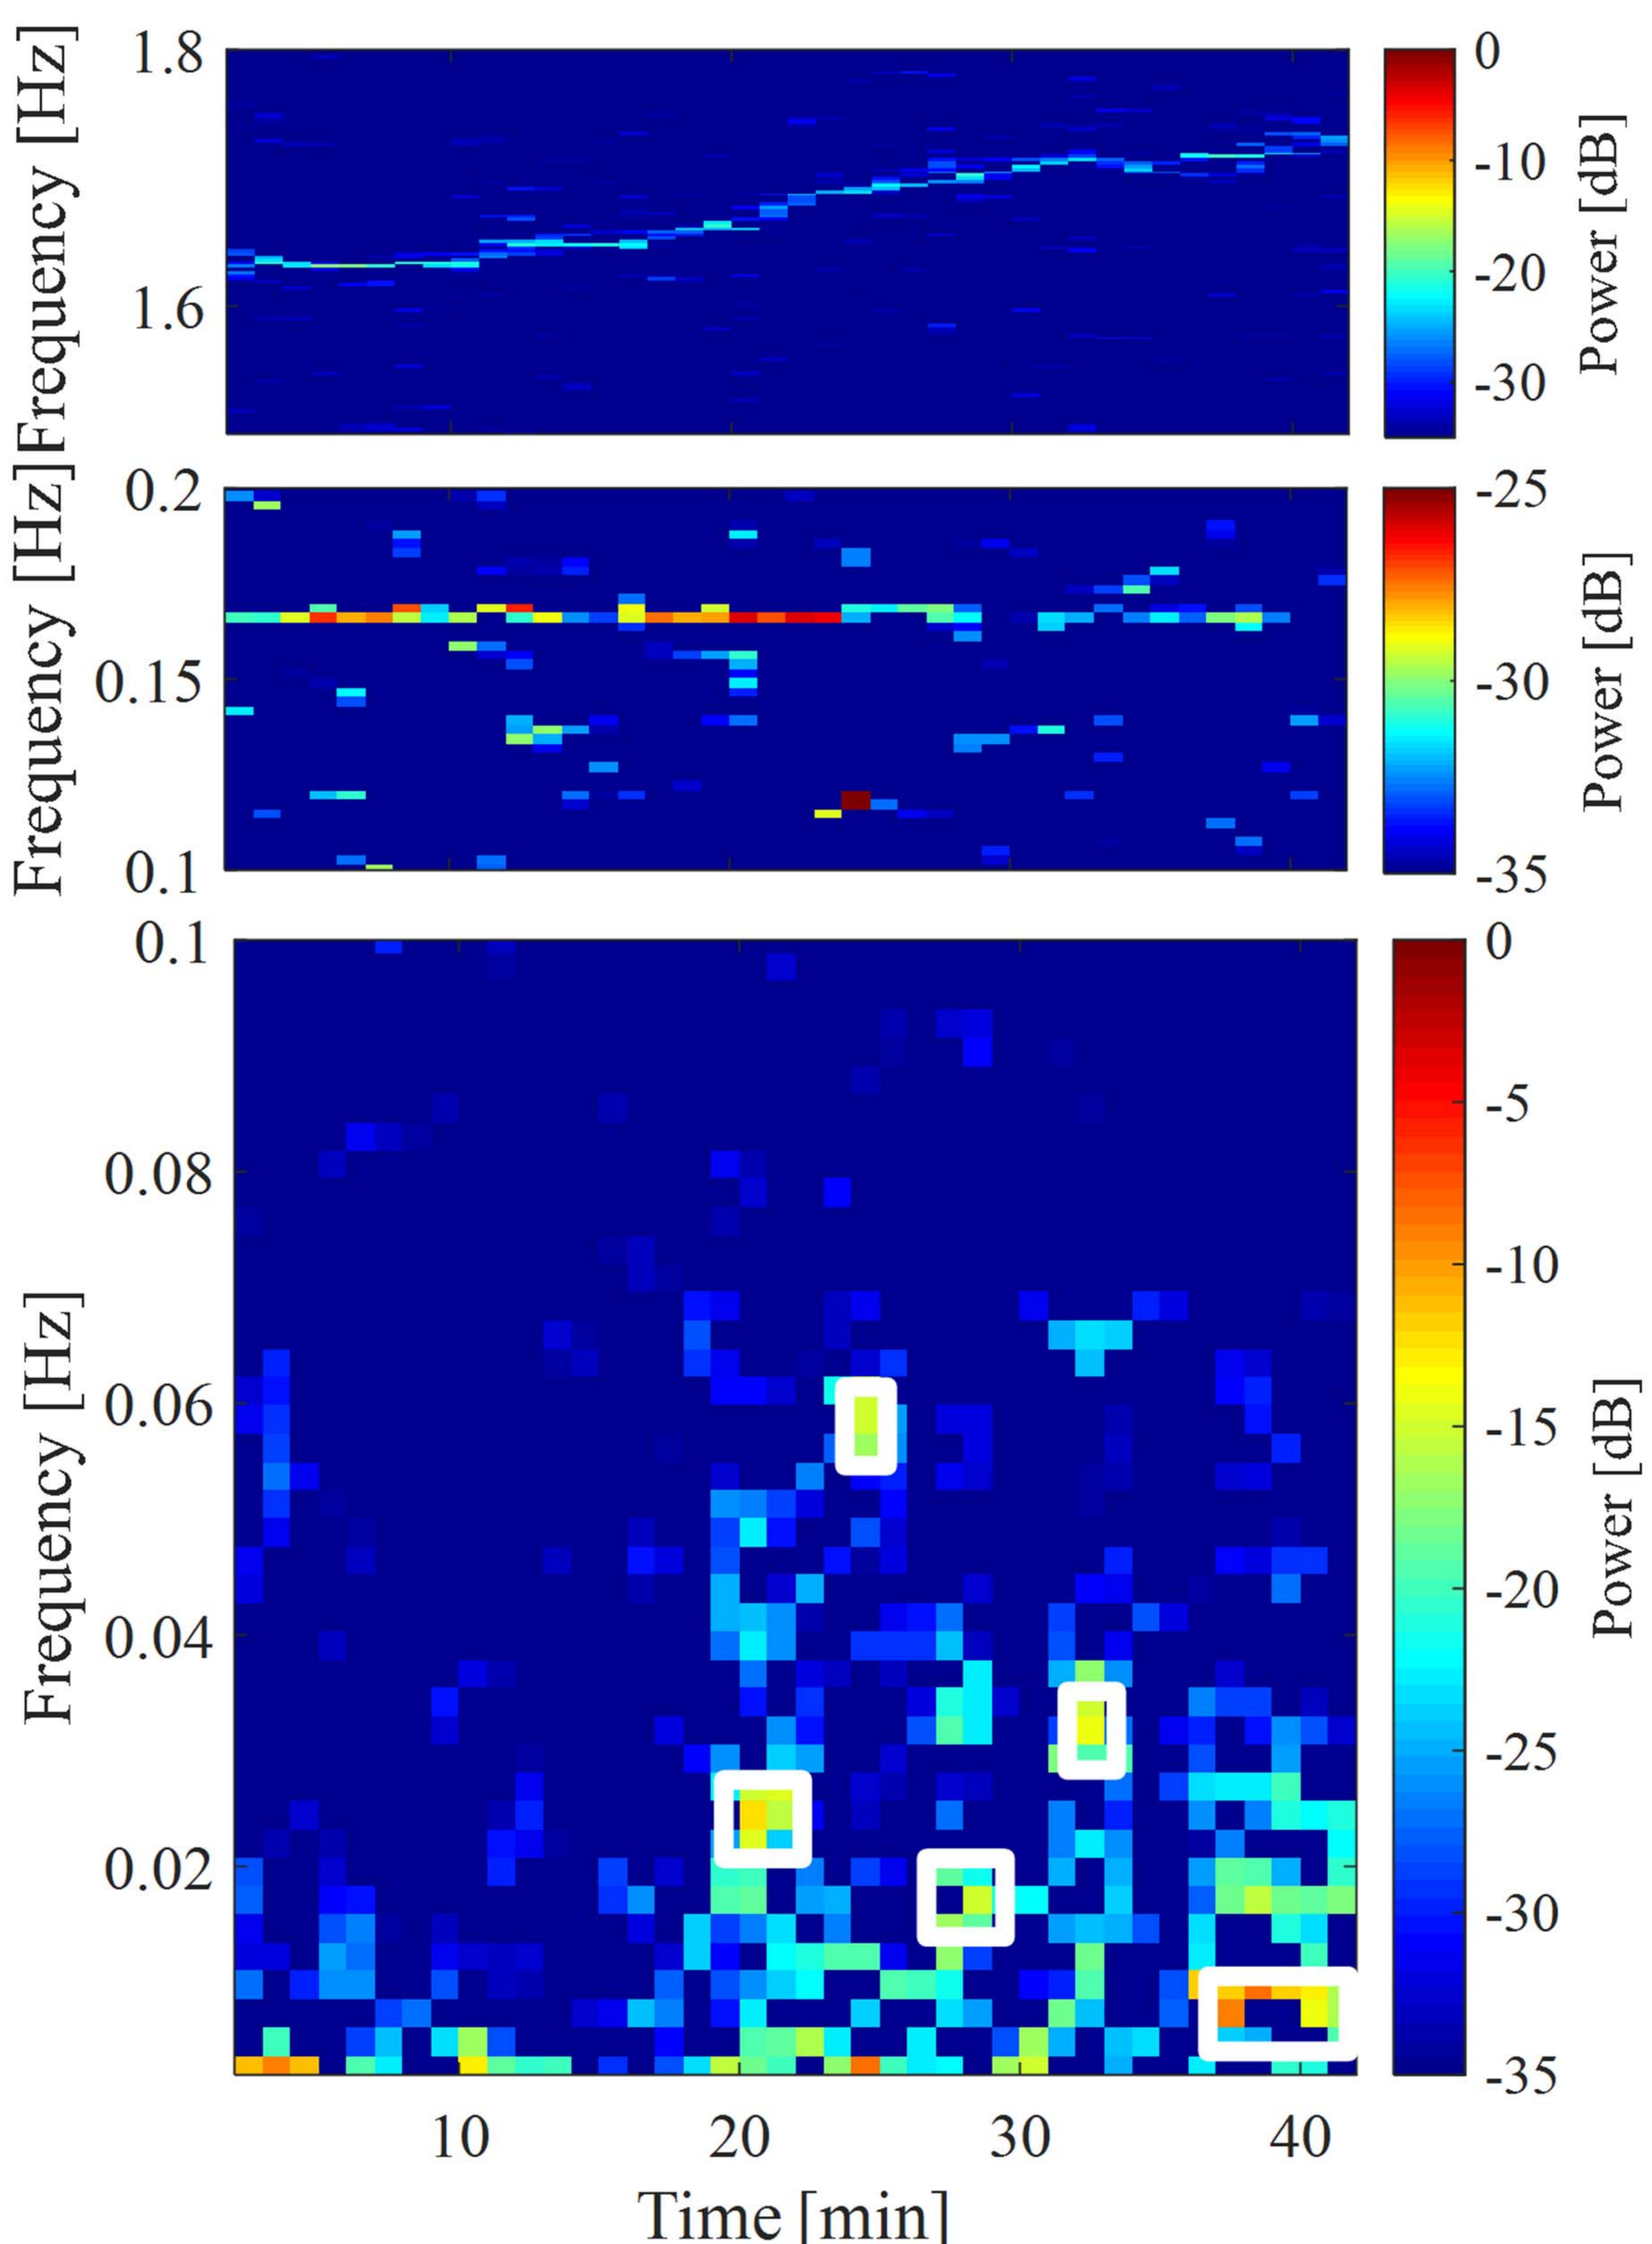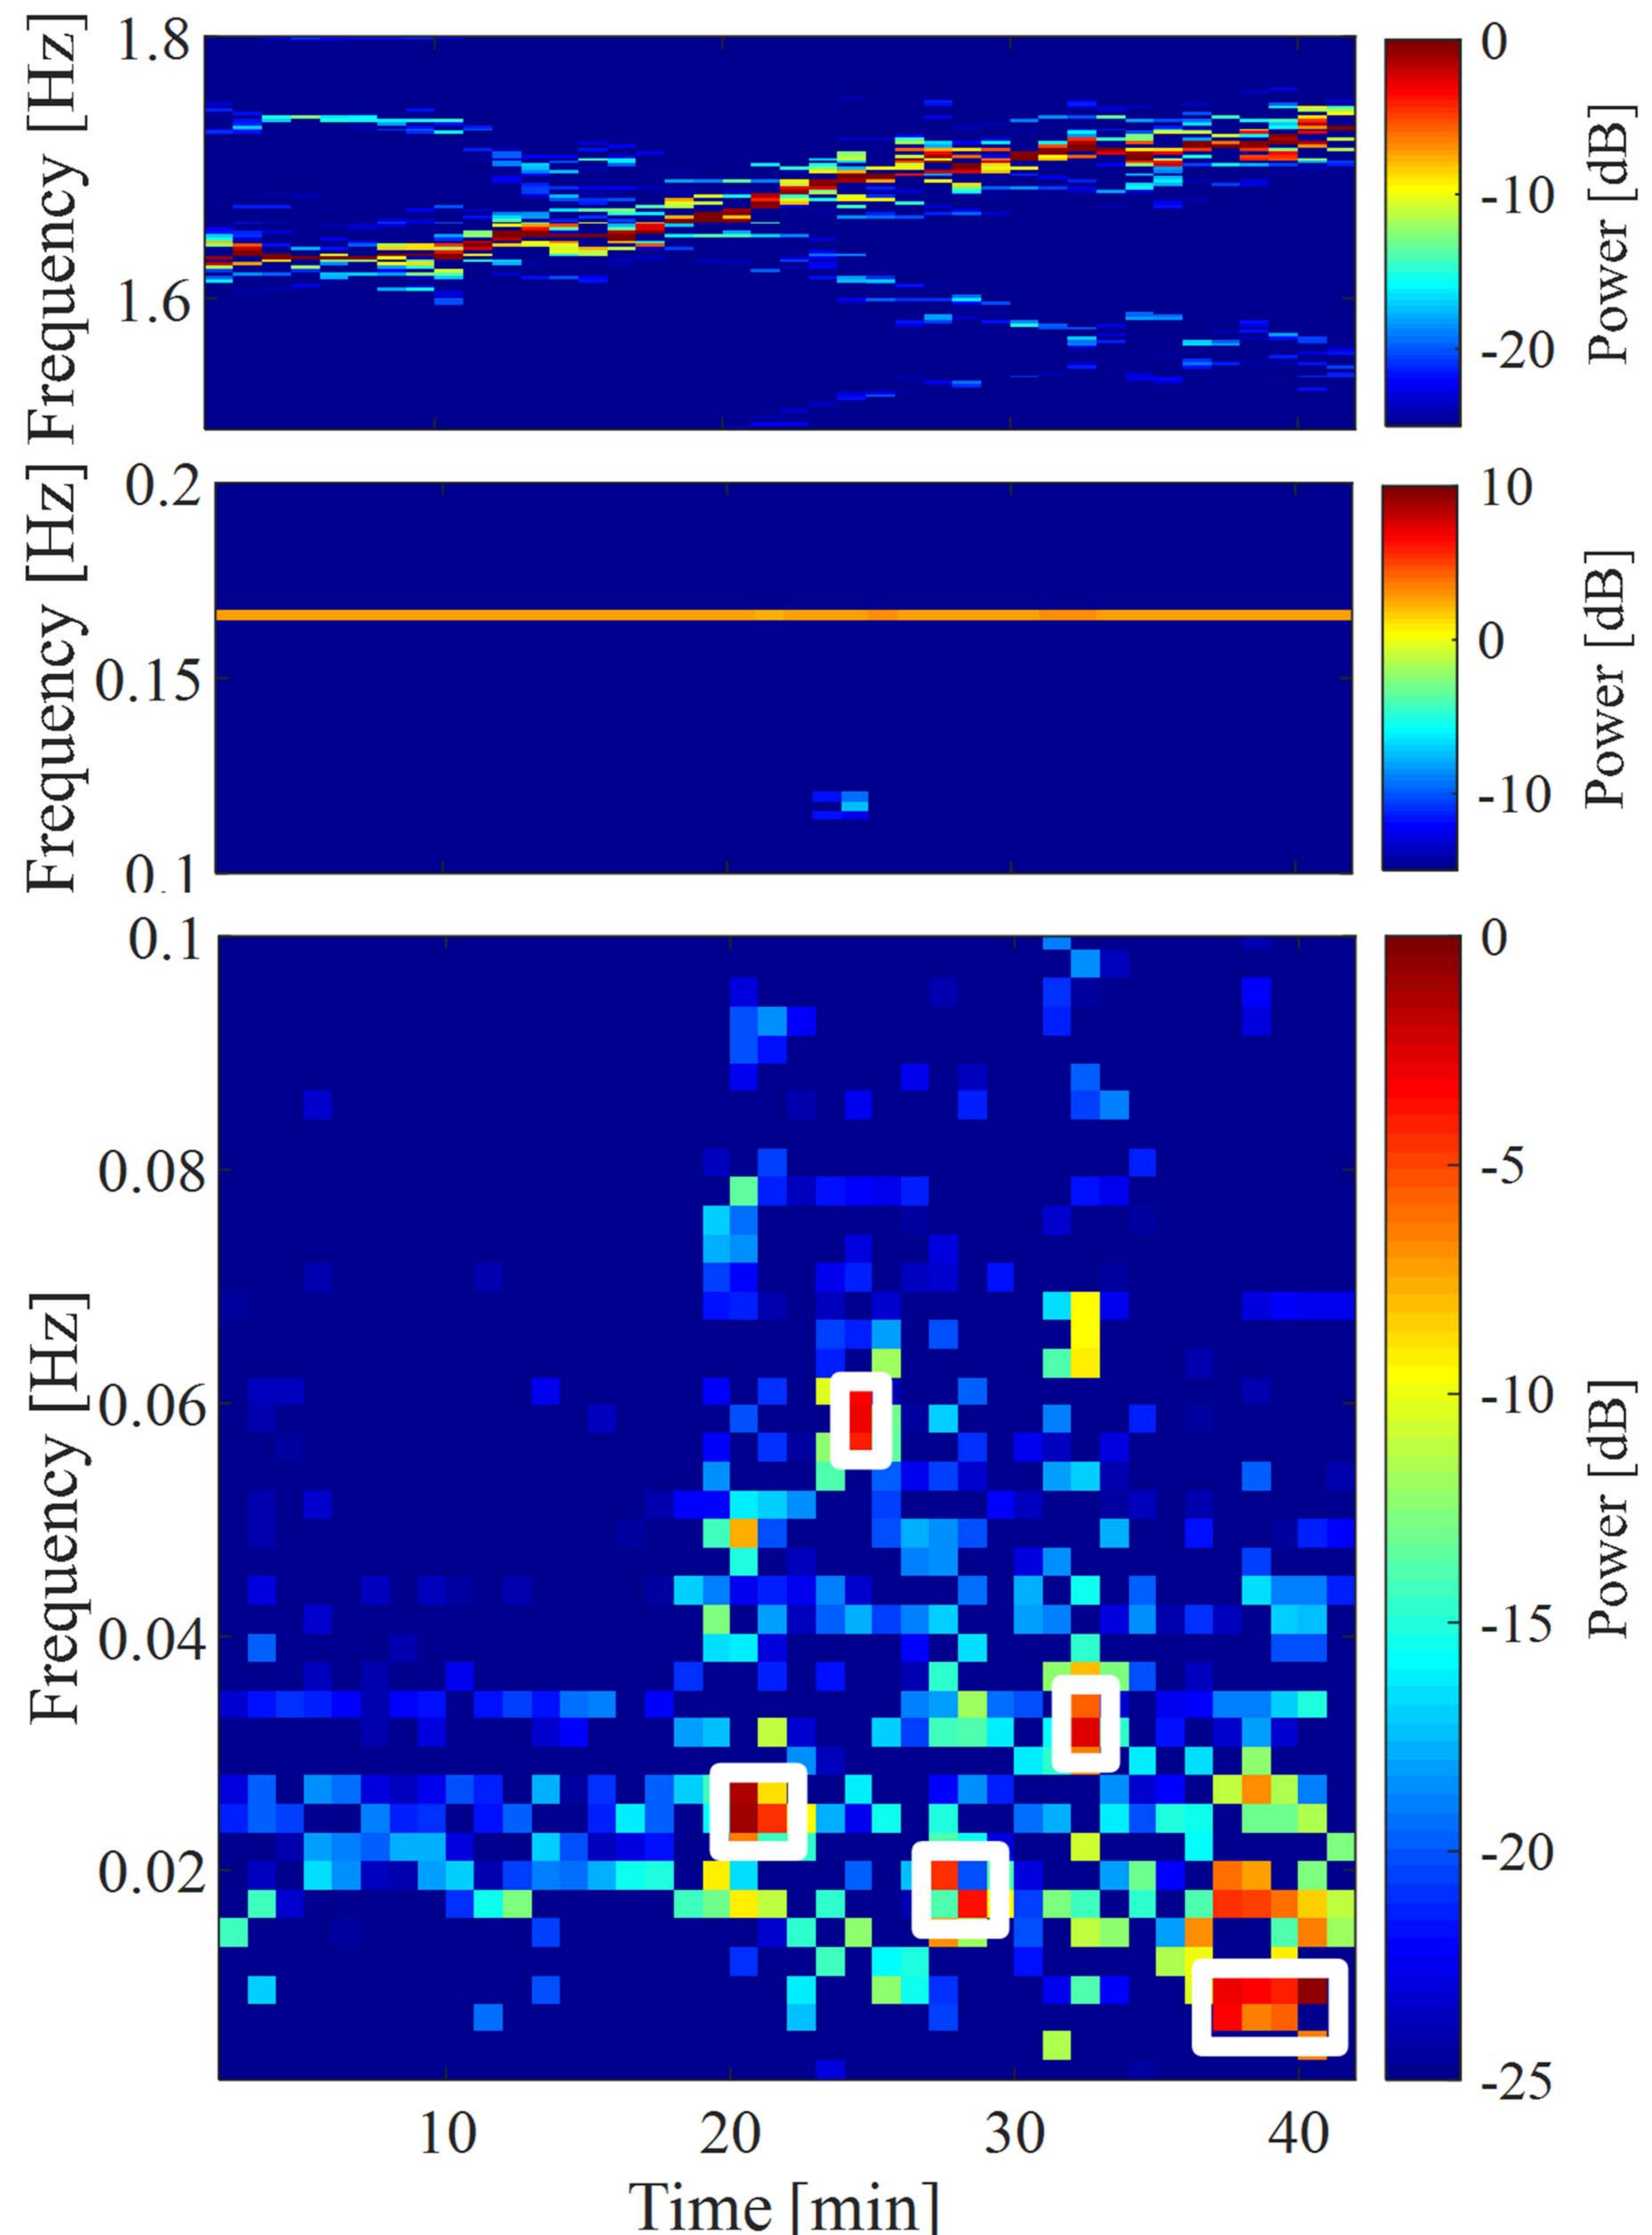

Supplement: JCB891359_Supplemental_Material2.pdf [file JCB891359_Supplemental_Material2.pdf]
